# Supplementary material for: Thioredoxin Confers Intrinsic Resistance to Cytostatic Drugs in Human Glioma Cells
Source: MDPI journal article supplement (doi:10.3390/ijms19102874), 2018-09-21
Supplement: s1 [file s1]

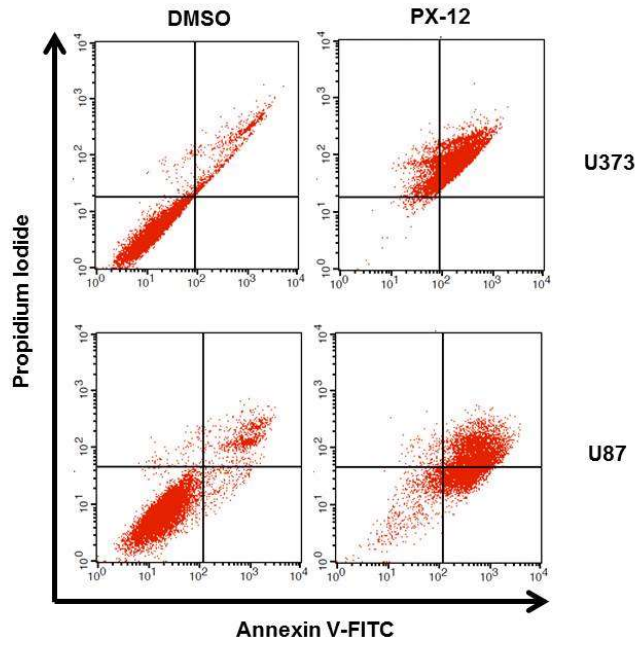

Figure S1. Representative FACS blots of U373 and U87 cells treated with either vehicle (DMSO) or 1000  $\mu$ M PX-12 for 72 hours as indicated. Annexin V positive cells were regarded as apoptotic cells.

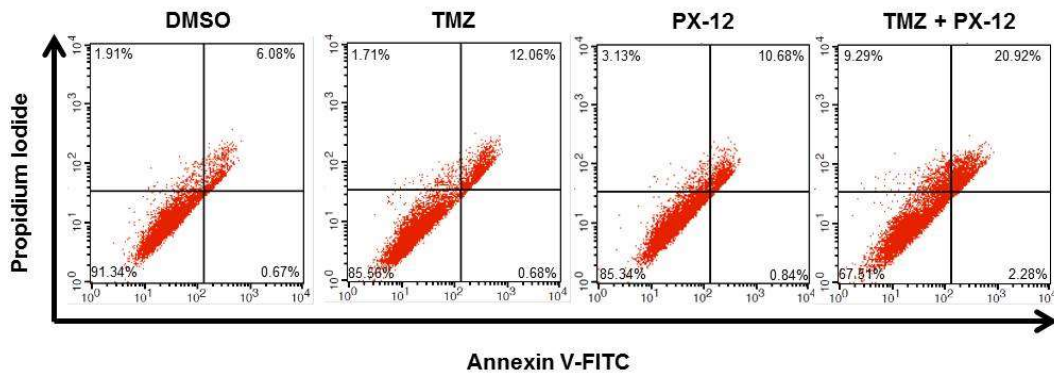

Figure S2. Representative FACS blots of primary GBM cells treated with either vehicle (DMSO) or 100  $\mu$ M PX-12, 1000  $\mu$ M TMZ, or a combination of both for 48 hours as indicated. Annexin V positive cells were regarded as apoptotic cells.
